# Supplementary material for: Development of ruthenium polypyridine metallo-monomers and characterization of their metallopolymers obtained by ROMP
Source: Royal Society of Chemistry journal article supplement (doi:10.1039/d1nj06085f), 2022-01-01
Supplement: d1nj06085f1.pdf [file d1nj06085f1.pdf]

## **New Journal of Chemistry**

### **Electronic Supplementary Information**

#### **Development of ruthenium polypyridine metallo-monomers and characterization of their metallopolymers obtained by ROMP**

Elizabeth A. Alves,<sup>a</sup> Vinicius K. Tomazett,<sup>a</sup> Daniele M. Martins,<sup>\*a</sup> Benedito S. Lima-  
Neto<sup>\*a</sup>

<sup>a</sup> São Carlos Institute of Chemistry, University of São Paulo (IQSC-USP), São Carlos,  
SP 13560-970, Brazil

E-mail: martins.mdq@usp.br (DMM); benedito@iqsc.usp.br (BSLN)

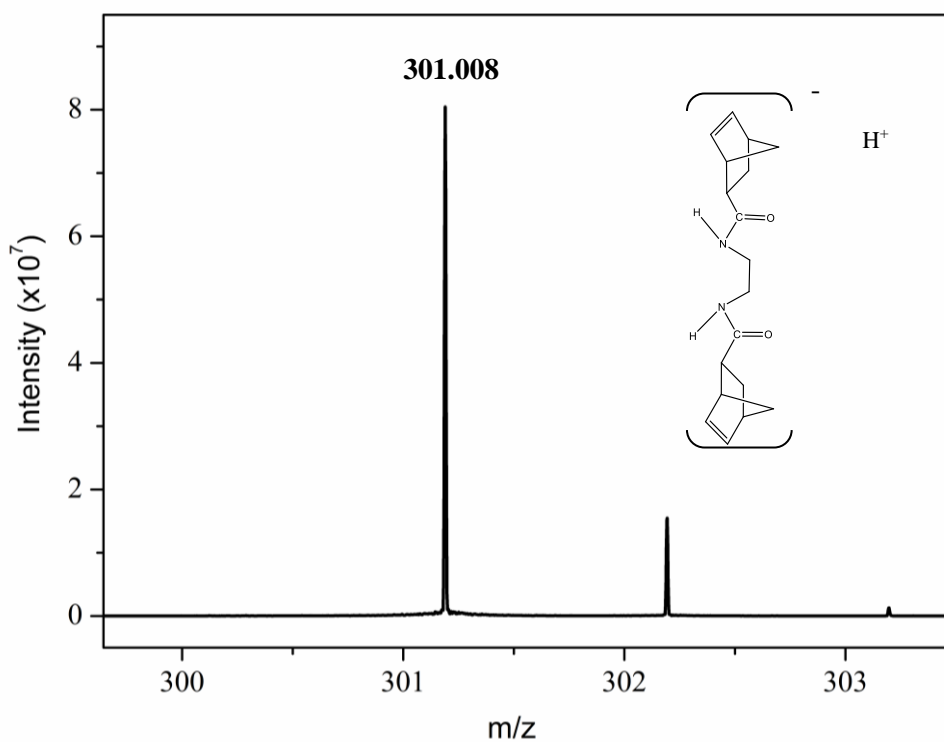

**Figure S1.** Mass spectrum of NEN ligand (**1**). ESI-MS( $m/z$ ): Calc. 300.1877, Found 301.1957 ( $M^+$ ).

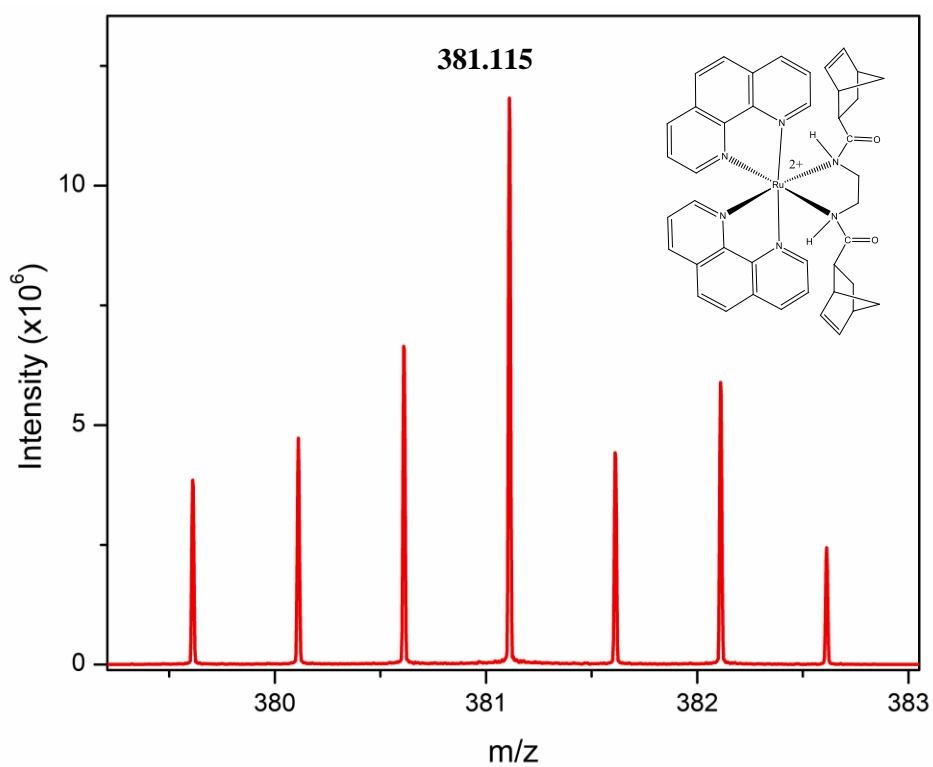

**Figure S2.** Mass spectrum of the complex ion (**3**) ( $[Ru]phen-NEN$ ) in positive mode. ESI-MS ( $m/z$ ): Calc. 381.1128, Found 381.115 ( $M^+$ ).

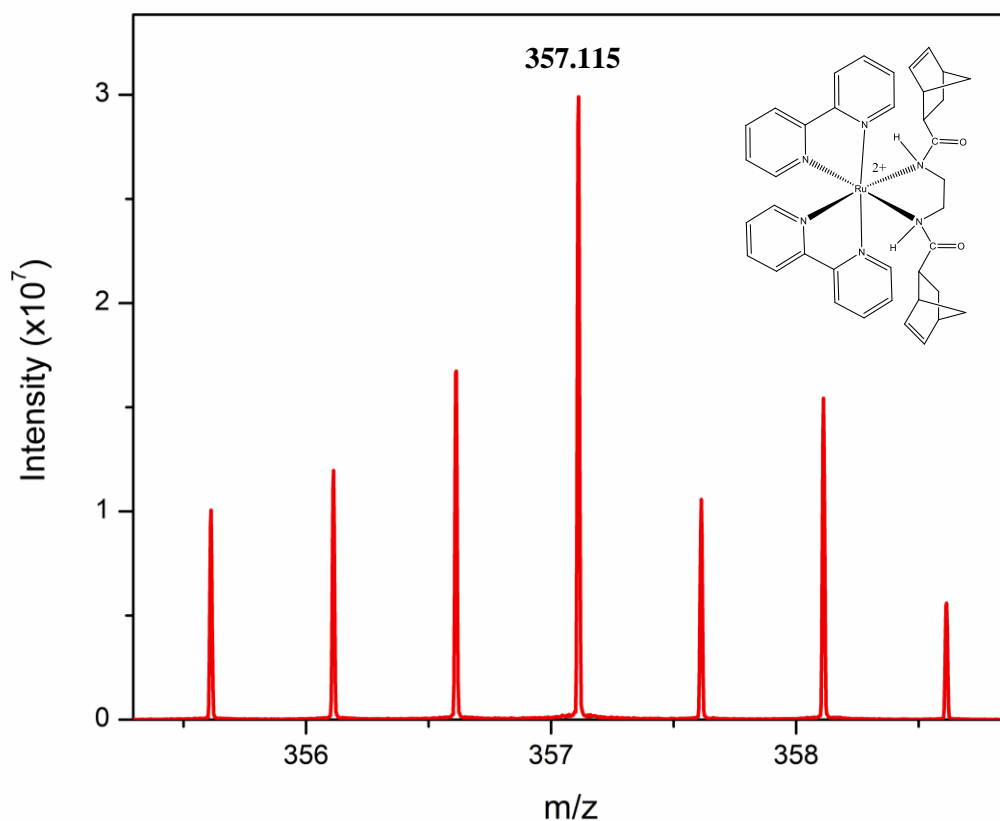

**Figure S3.** Mass spectrum of the complex ion (**5**) ([Ru]bpy-NEN), in positive mode. ESI-MS( $m/z$ ): Calc. 357.1128, Found 357.115 ( $M^+$ ).

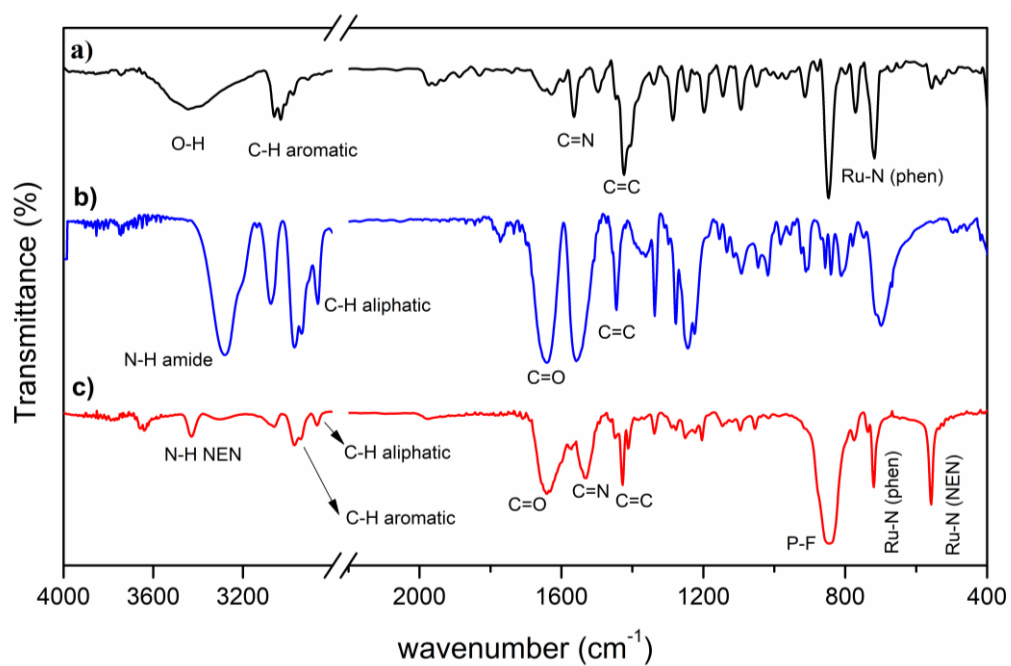

**Figure S4.** Infrared spectra of complexes a) [Ru]phen-Cl (**2**), b) NEN (**1**) and c) [Ru]phen-NEN (**3**) in KBr.

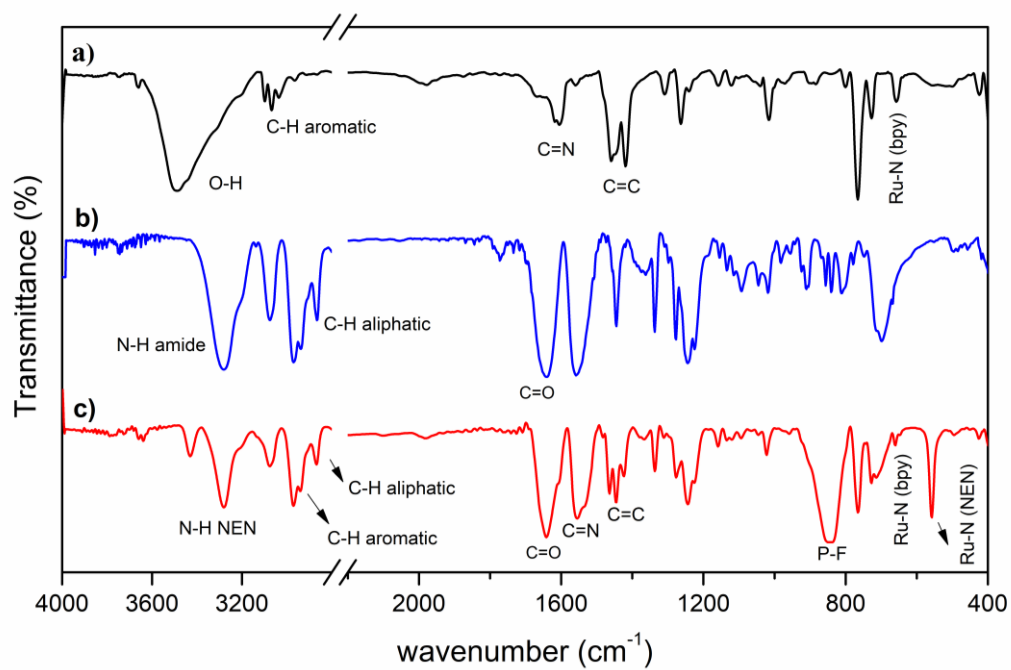

**Figure S5.** Infrared spectra of complexes a) [Ru]bpy-Cl (**4**), b) NEN (**1**) and c) [Ru]bpy-NEN (**5**) in KBr.

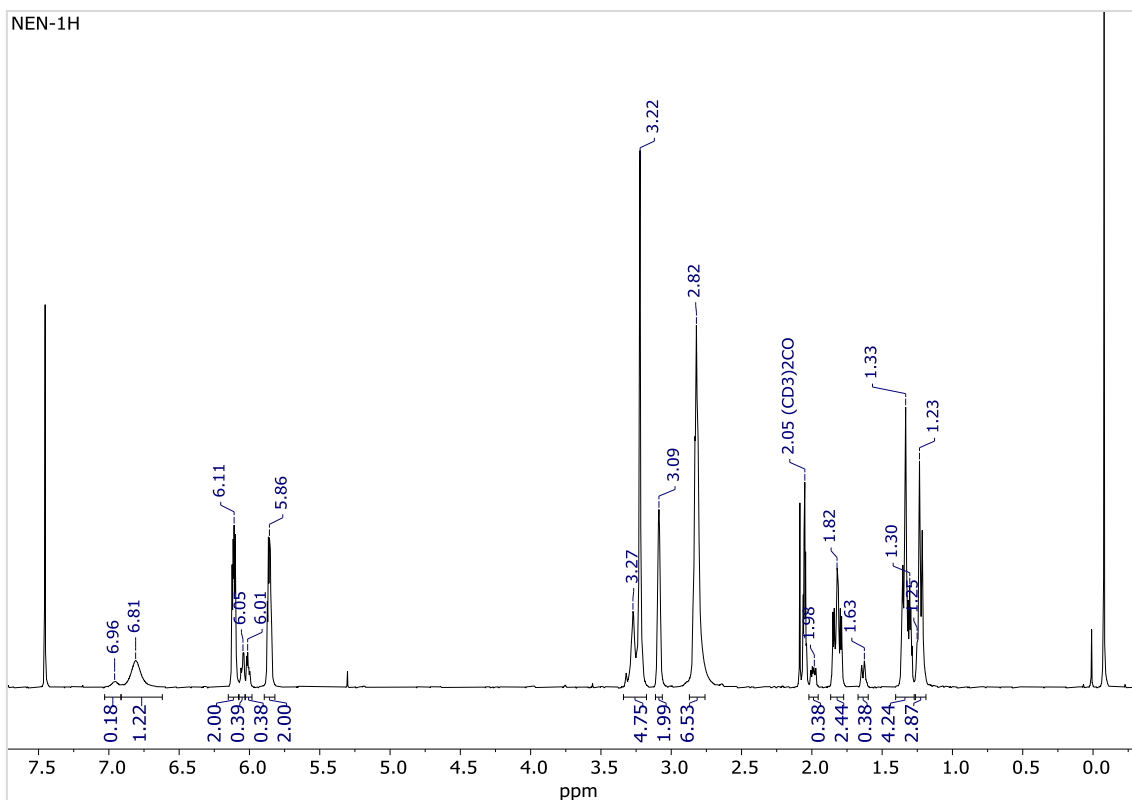

**Figure S6.** <sup>1</sup>H-NMR (500 MHz) of NEN (**1**) in (CD<sub>3</sub>)<sub>2</sub>CO/CDCl<sub>3</sub>. The signals corresponding to the *endo*-NEN and *exo*-NEN portions are present at a 4:1 ratio from olefins associated with the mixture of the *endo* and *exo* isomers of 5-norbornene-2-carboxylic acid.

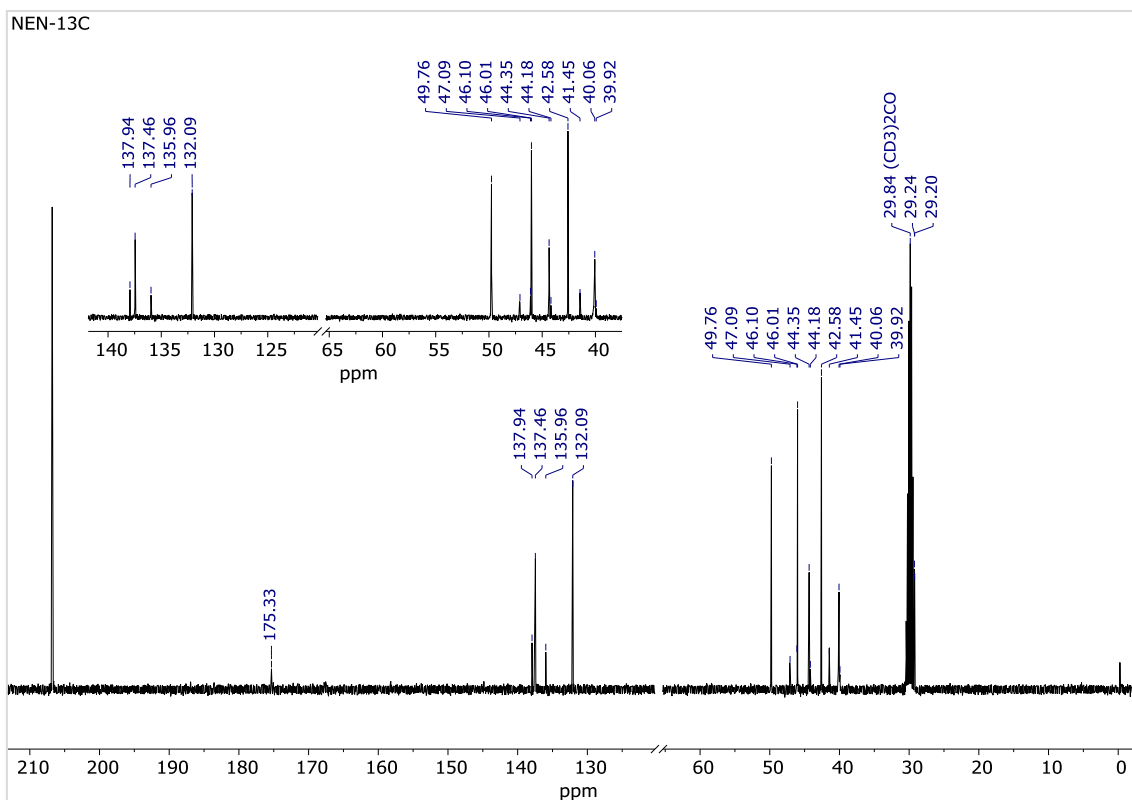

**Figure S7.** <sup>13</sup>C-NMR (500 MHz) of NEN (**1**) in (CD<sub>3</sub>)<sub>2</sub>CO/CDCl<sub>3</sub>.

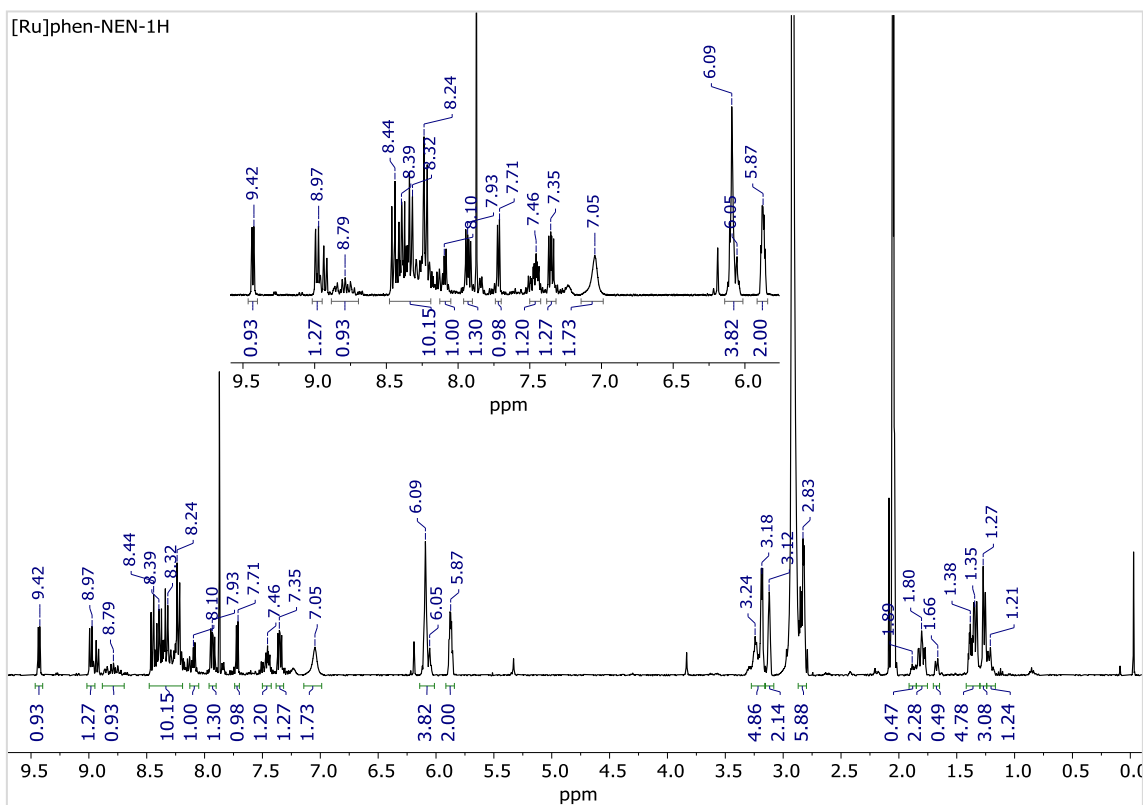

**Figure S8.** <sup>1</sup>H-NMR (500 MHz) of complex **3** ([Ru]phen-NEN) in (CD<sub>3</sub>)<sub>2</sub>CO/CDCl<sub>3</sub>.

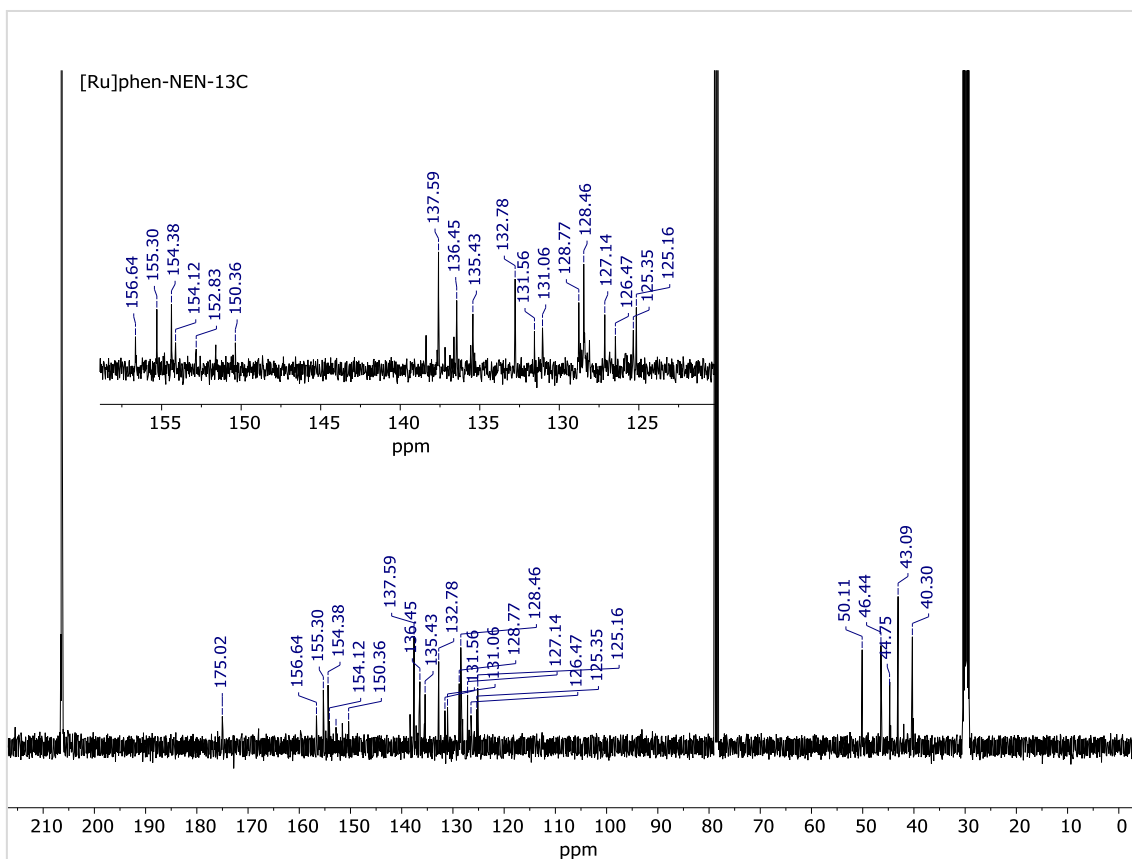

**Figure S9.**  $^{13}\text{C}$ -NMR (500 MHz) of complex **3** ([Ru]phen-NEN) in  $(\text{CD}_3)_2\text{CO}/\text{CDCl}_3$ .

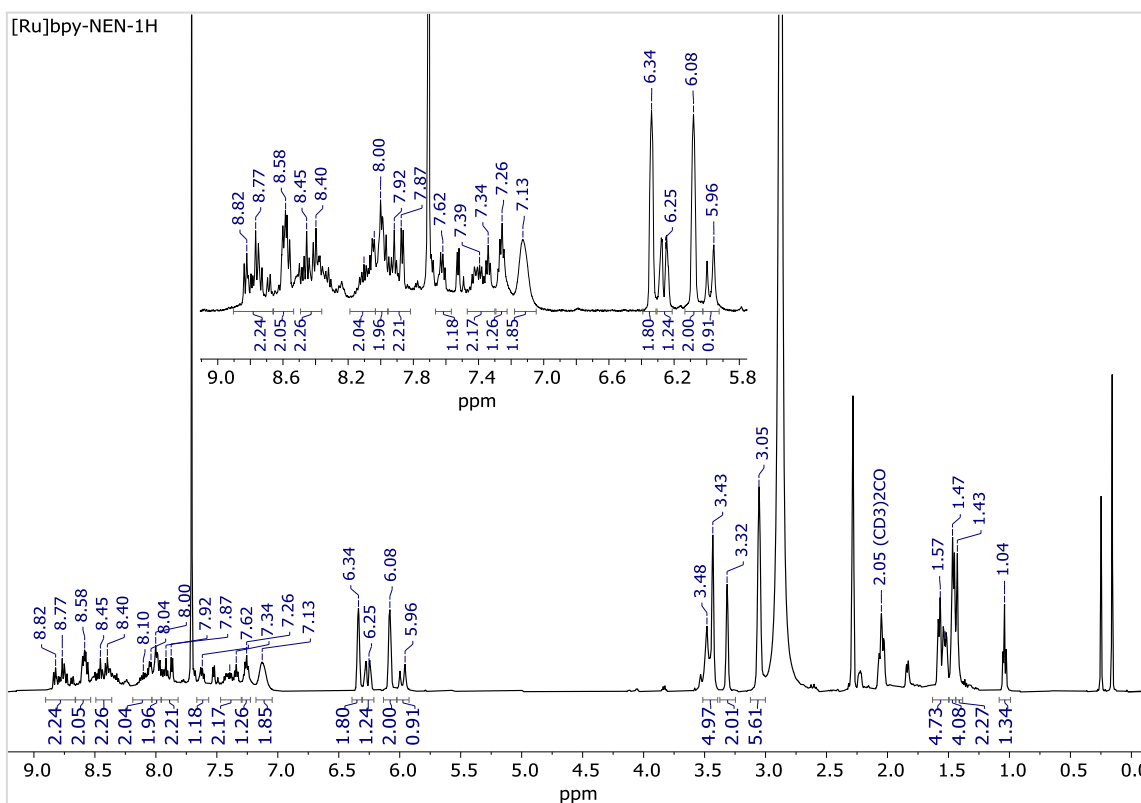

**Figure S10.**  $^1\text{H}$ -NMR (500 MHz) of complex **5** ([Ru]bpy-NEN) in  $(\text{CD}_3)_2\text{CO}/\text{CDCl}_3$ .

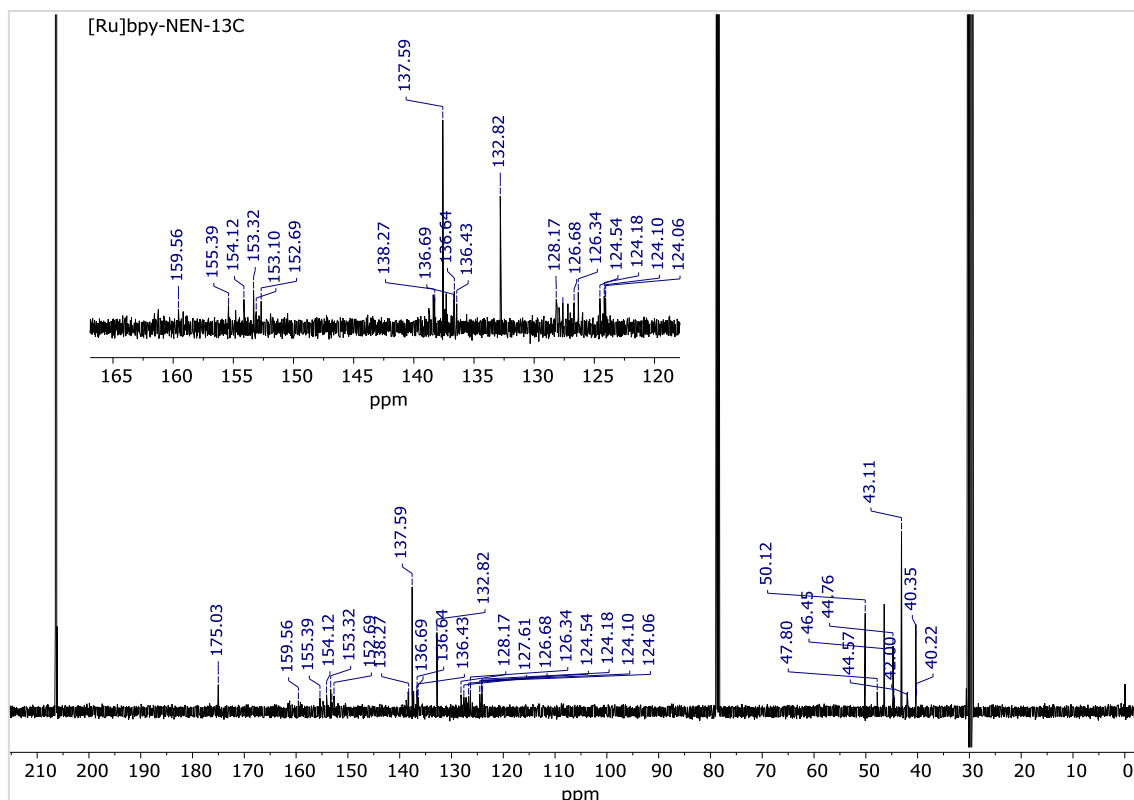

**Figure S11.**  $^{13}\text{C}$ -NMR (500 MHz) of complex **5** ( $[\text{Ru}]\text{bpy-NEN}$ ) in  $(\text{CD}_3)_2\text{CO}/\text{CDCl}_3$ .

**Table S1.**  $^1\text{H}$  NMR assignments for Figs. S3-S8 obtained in  $(\text{CD}_3)_2\text{CO}/\text{CDCl}_3$  at 25 °C.

|           | NEN           |                               | $[\text{Ru}]\text{phen-NEN}$ |                               | $[\text{Ru}]\text{bpy-NEN}$ |                               |
|-----------|---------------|-------------------------------|------------------------------|-------------------------------|-----------------------------|-------------------------------|
|           | $^1\text{H}$  | $^{13}\text{C}\{^1\text{H}\}$ | $^1\text{H}$                 | $^{13}\text{C}\{^1\text{H}\}$ | $^1\text{H}$                | $^{13}\text{C}\{^1\text{H}\}$ |
| <b>1</b>  | 6.11          | 132.09                        | 6.09                         | 132.78                        | 6.34                        | 132.82                        |
| <b>2</b>  | 3.09          | 44.35                         | 3.12                         | 44.75                         | 3.32                        | 44.76                         |
| <b>3</b>  | 2.82          | 49.76                         | 2.83                         | 50.10                         | 3.05                        | 50.12                         |
| <b>4</b>  | 1.82;<br>1.30 | 29.24                         | 1.80; 1.38                   |                               | 1.43; 1.53                  |                               |
| <b>5</b>  | 5.86          | 137.46                        | 5.87                         | 137.59                        | 6.08                        | 137.59                        |
| <b>6</b>  | 2.82          | 42.58                         | 2.83                         | 43.10                         | 3.05                        | 43.11                         |
| <b>7</b>  | 1.33;<br>1.23 | 46.01                         | 1.35; 1.27                   | 46.44                         | 1.57; 1.47                  | 46.45                         |
| <b>8</b>  |               | 175.33                        |                              | 175.02                        |                             | 175.03                        |
| <b>9</b>  | 6.81          |                               | 7.05                         |                               | 7.13                        |                               |
| <b>10</b> | 6.81          |                               | 7.05                         |                               | 7.13                        |                               |
| <b>11</b> |               | 175.33                        |                              | 175.02                        |                             | 175.03                        |
| <b>12</b> | 1.82;<br>1.30 | 29.24                         | 1.80; 1.38                   |                               | 1.43 ; 1.53                 |                               |
| <b>13</b> | 2.82          | 42.58                         | 2.83                         | 43.10                         | 3.05                        | 43.11                         |
| <b>14</b> | 5.86          | 137.46                        | 5.87                         | 137.59                        | 6.08                        | 137.59                        |
| <b>15</b> | 6.11          | 132.09                        | 6.09                         | 132.78                        | 6.34                        | 132.82                        |
| <b>16</b> | 2.82          | 49.76                         | 2.83                         | 50.10                         | 3.05                        | 50.12                         |
| <b>17</b> | 3.09          | 44.35                         | 3.12                         | 44.75                         | 3.32                        | 44.76                         |
| <b>18</b> | 1.33;<br>1.23 | 46.01                         | 1.35; 1.27                   | 46.44                         | 1.57; 1.47                  | 46.45                         |
| <b>19</b> | 3.22          | 40.06                         | 3.18                         | 40.30                         | 3.43                        | 40.35                         |



|    |      |       |             |        |      |        |
|----|------|-------|-------------|--------|------|--------|
| 20 | 3.22 | 40.06 | 3.18        | 40.30  | 3.43 | 40.35  |
| 21 |      |       | 9.42        | 155.30 | 8.82 | 155.39 |
| 22 |      |       | 7.46        | 135.43 | 7.39 | 126.34 |
| 23 |      |       | 8.49 - 8.16 | 128.77 | 8.58 | 138.27 |
| 24 |      |       |             | 125.35 | 8.45 | 124.06 |
| 25 |      |       | 8.49 - 8.16 | 128.46 |      | 159.56 |
| 26 |      |       | 8.49 - 8.16 | 128.46 |      | 153.10 |
| 27 |      |       |             | 131.06 | 7.92 | 124.18 |
| 28 |      |       | 8.49 - 8.16 | 125.16 | 8.00 | 132.69 |
| 29 |      |       | 7.93        | 127.14 | 7.62 | 127.61 |
| 30 |      |       | 7.71        | 154.38 | 8.04 | 153.32 |
| 31 |      |       |             | 152.63 | 8.77 | 154.12 |
| 32 |      |       |             | 156.64 | 8.10 | 126.68 |
| 33 |      |       | 8.97        | 155.30 | 8.58 | 136.43 |
| 34 |      |       | 8.79        | 135.43 | 8.40 | 124.10 |
| 35 |      |       | 8.49 - 8.16 | 128.77 |      | 161.23 |
| 36 |      |       |             | 126.47 |      | 154.81 |
| 37 |      |       | 8.49 - 8.16 | 128.46 | 7.34 | 124.55 |
| 38 |      |       | 8.49 - 8.16 | 128.46 | 8.00 | 136.64 |
| 39 |      |       |             | 131.56 | 7.26 | 128.17 |
| 40 |      |       | 8.49 - 8.16 | 136.45 | 7.87 | 152.69 |
| 41 |      |       | 7.35        | 127.14 |      |        |
| 42 |      |       | 8.10        | 154.38 |      |        |
| 43 |      |       |             | 150.36 |      |        |
| 44 |      |       |             | 154.12 |      |        |

a) Syntheses

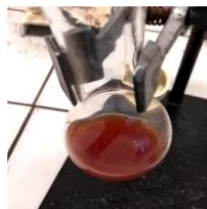

b) Precipitation

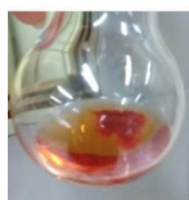

c) Copolymer

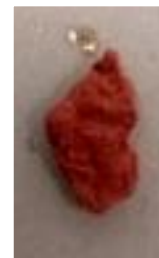

**Figure S12.** Images of **a)** reaction solution during copolymer; **b)** methanol precipitated copolymer; **c)** isolated copolymer.

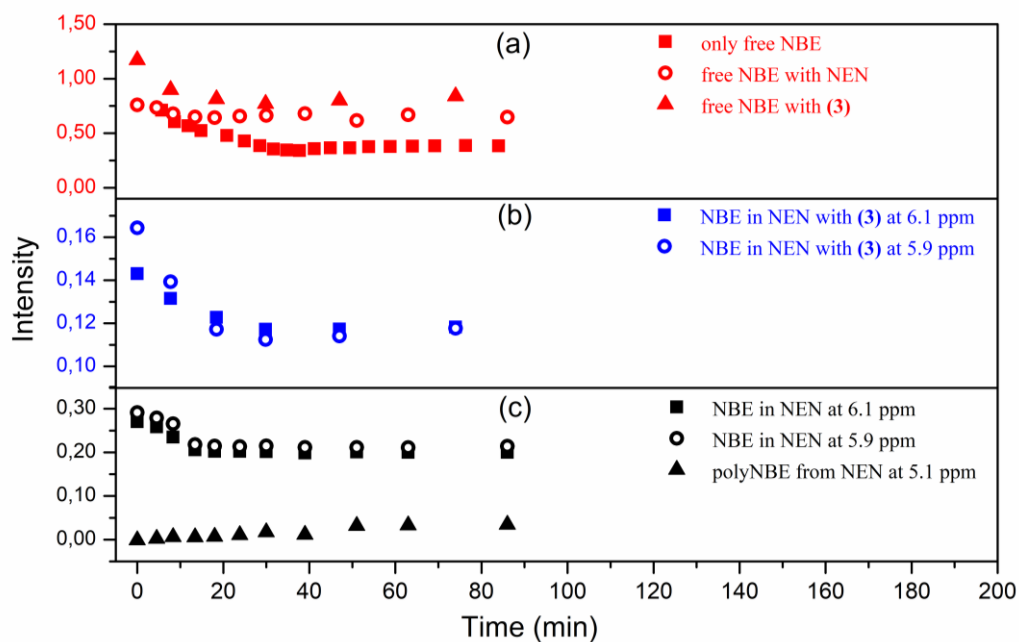

**Figure S13.** Intensities of signals in the  $^1\text{H}$  NMR spectra from Figure 3, from (a) ROMP of NBE, (b) ROMP of NBE with NEN and (c) ROMP of NBE with **3**.

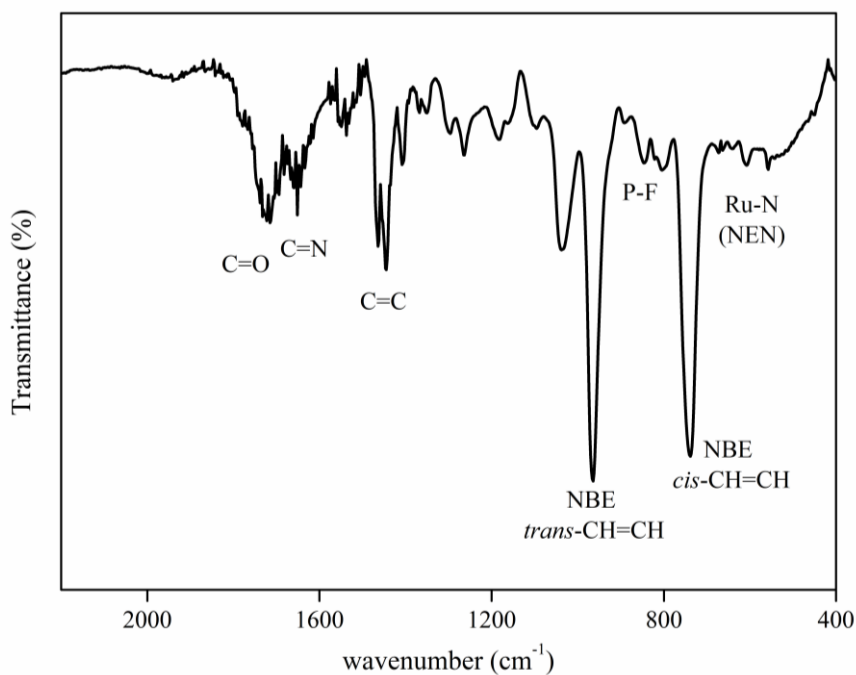

**Figure S14.** Infrared spectrum of copolymer from ROMP of NBE with complex **3**.

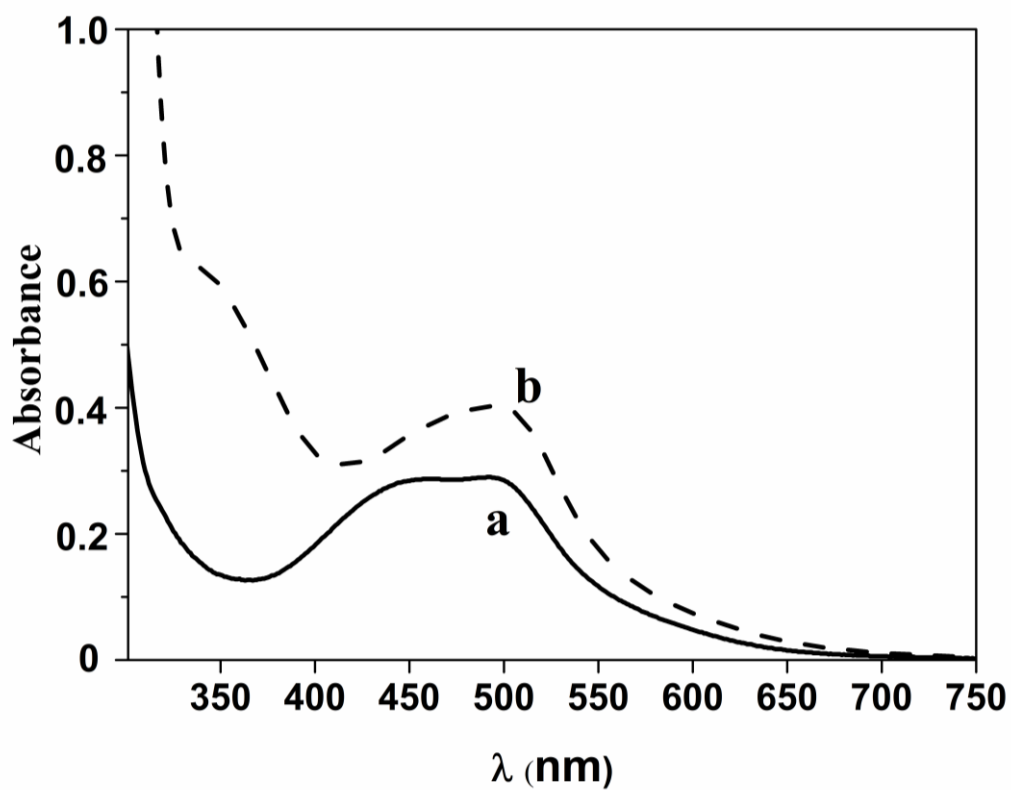

**Figure S15.** UV-Vis spectra of the methanol mother liquor with the chloroform washes from the synthesis of the copolymers from reaction of NBE **a**) with [Ru]phen-NEN (**3**) or **b**) with [Ru]bpy-NEN (**5**) (dashed line).
